# Supplementary material
Source: PubMed Central journal article supplement (PMC8028676)
Supplement: BPA-28-663-s001.pdf [file BPA-28-663-s001.pdf]

**Table S1.** Copy number aberrations (CNA) detected by array comparative genomic hybridization.

| Case                                     | Chromosomal location                     | Loc. Start*             | Loc. Stop*             | CNA**                                    |
|------------------------------------------|------------------------------------------|-------------------------|------------------------|------------------------------------------|
| Case 1                                   | <b>3p26.3 - q29 (whole chromosome)</b>   | <b>93949</b>            | <b>197845254</b>       | <b>Gain (0.320935)</b>                   |
|                                          | 4q13.2                                   | 69223075                | 69462438               | Homozygous deletion (-1.51678)           |
|                                          | 6p22.1                                   | 29854870                | 29896710               | Gain (2.735431)                          |
|                                          | <b>7p22.3 - q36.3 (whole chromosome)</b> | <b>42976</b>            | <b>159118566</b>       | <b>Gain (0.565555)</b>                   |
|                                          | <b>9p24.3 - p13.1 (whole arm)</b>        | <b>204193</b>           | <b>38768291</b>        | <b>Gain (0.308436)</b>                   |
|                                          | 9p21.3                                   | 21944037                | 22176231               | Homozygous deletion (-1.382063)          |
|                                          | <b>9q21.11 - q34.3 (whole arm)</b>       | <b>71151735</b>         | <b>141018984</b>       | <b>Gain (0.367163)</b>                   |
|                                          | 10p15.3 - q26.3 (whole chromosome)       | 136361                  | 135089504              | Heterozygous deletion (-0.350396)        |
|                                          | <b>13q12.11 - q34 (whole arm)</b>        | <b>19526064</b>         | <b>115089535</b>       | <b>Gain (0.313476)</b>                   |
|                                          | 18q11.2 - q12.3                          | 19004109                | 40832816               | Heterozygous deletion (-0.327937)        |
|                                          | <b>18q12.3 - q23</b>                     | <b>41143464</b>         | <b>78010032</b>        | <b>Gain (0.317707)</b>                   |
|                                          | 20p13 - q13.33 (whole chromosome)        | 121521                  | 62880583               | Gain (0.330833)                          |
|                                          | 21q11.2 - q22.3 (whole arm)              | 15372467                | 48090317               | Gain (0.558608)                          |
|                                          | Case 2                                   | <b>1p36.33 - p36.23</b> | <b>759762</b>          | <b>8749497</b>                           |
| <b>1p35.3</b>                            |                                          | <b>28266522</b>         | <b>29653134</b>        | <b>Heterozygous deletion (-0.302864)</b> |
| <b>1p34.2 - p22.2</b>                    |                                          | <b>40288246</b>         | <b>91311655</b>        | <b>Heterozygous deletion (-0.279675)</b> |
| <b>1q32.2 - q42.2</b>                    |                                          | <b>209342761</b>        | <b>230753927</b>       | <b>Heterozygous deletion (-0.371906)</b> |
| <b>2p25.3 - p11.2 (whole arm)</b>        |                                          | <b>42444</b>            | <b>89538874</b>        | <b>Gain (0.345952)</b>                   |
| <b>2q11.1 - q22.2</b>                    |                                          | <b>95529039</b>         | <b>142709232</b>       | <b>Gain (0.347157)</b>                   |
| <b>3q24 - q26.2</b>                      |                                          | <b>145644746</b>        | <b>169235435</b>       | <b>Gain (0.362882)</b>                   |
| <b>4q31.21 - q35.2</b>                   |                                          | <b>142663747</b>        | <b>190790881</b>       | <b>Heterozygous deletion (-0.380461)</b> |
| <b>6p25.3 - p11.2</b>                    |                                          | <b>389423</b>           | <b>58435710</b>        | <b>Heterozygous deletion (-0.317938)</b> |
| <b>6q11.1 - q22.33</b>                   |                                          | <b>61982931</b>         | <b>127407686</b>       | <b>Heterozygous deletion (-0.377149)</b> |
| <b>6q23.3 - q24.1</b>                    |                                          | <b>138476510</b>        | <b>142468952</b>       | <b>Heterozygous deletion (-0.371592)</b> |
| <b>7q33 - q36.3</b>                      |                                          | <b>135250552</b>        | <b>159118566</b>       | <b>Gain (0.593265)</b>                   |
| <b>8p23.3 - p11.1 (whole arm)</b>        |                                          | <b>219683</b>           | <b>43396776</b>        | <b>Heterozygous deletion (-0.365243)</b> |
| <b>8q11.21 - q12.3</b>                   |                                          | <b>49091300</b>         | <b>62336764</b>        | <b>Heterozygous deletion (-0.404825)</b> |
| <b>8q13.3</b>                            |                                          | <b>71238938</b>         | <b>72406658</b>        | <b>Heterozygous deletion (-0.42469)</b>  |
| <b>8q13.3 - q24.3</b>                    |                                          | <b>73125197</b>         | <b>146085532</b>       | <b>Heterozygous deletion (-0.372239)</b> |
| 9p22.1 - p11.2                           |                                          | 19564273                | 26162174               | Heterozygous deletion (-0.750144)        |
| 9p21.3                                   |                                          | 21036673                | 22733971               | Homozygous deletion (-1.333769)          |
| 9q21.13 - q31.3                          |                                          | 79086651                | 112617941              | Gain (0.548115)                          |
| <b>11q14.1 - q14.3</b>                   |                                          | <b>81732787</b>         | <b>90039085</b>        | <b>Gain (0.335935)</b>                   |
| <b>13q11 - q34 (whole arm)</b>           |                                          | <b>19296544</b>         | <b>115096466</b>       | <b>Heterozygous deletion (-0.374167)</b> |
| <b>16q22.2 - q23.1</b>                   |                                          | <b>71913790</b>         | <b>75360302</b>        | <b>Heterozygous deletion (-0.283991)</b> |
| <b>16q23.2 - q24.3</b>                   |                                          | <b>79225966</b>         | <b>89977030</b>        | <b>Heterozygous deletion (-0.389361)</b> |
| <b>17p13.3 - p11.2 (whole arm)</b>       |                                          | <b>76263</b>            | <b>22154574</b>        | <b>Heterozygous deletion (-0.349955)</b> |
| <b>17q11.1 - q11.2</b>                   |                                          | <b>25435421</b>         | <b>30348467</b>        | <b>Heterozygous deletion (-0.324576)</b> |
| <b>17q21.2 - q21.31</b>                  |                                          | <b>40318960</b>         | <b>42940605</b>        | <b>Heterozygous deletion (-0.311494)</b> |
| <b>17q21.31 - q25.1</b>                  |                                          | <b>42962663</b>         | <b>72659034</b>        | <b>Gain (0.828081)</b>                   |
| <b>18p11.32 - q23 (whole chromosome)</b> |                                          | <b>162510</b>           | <b>78010032</b>        | <b>Heterozygous deletion (-0.354022)</b> |
| <b>22q12.1 - q13.33</b>                  | <b>27099649</b>                          | <b>51219009</b>         | <b>Gain (0.396596)</b> |                                          |
| Case 3                                   | <b>6q11.1 - q27</b>                      | <b>62305272</b>         | <b>166262838</b>       | <b>Heterozygous deletion (-0.268362)</b> |
|                                          | <b>7p22.3 - q36.3 (whole chromosome)</b> | <b>65558</b>            | <b>159118566</b>       | <b>Gain (0.547574)</b>                   |
|                                          | 8p11.22                                  | 39237438                | 39374789               | Homozygous deletion (-1.165137)          |
|                                          | <b>9p22.3</b>                            | <b>15086757</b>         | <b>15920360</b>        | <b>Heterozygous deletion (-0.300928)</b> |
|                                          | <b>9p21.3</b>                            | <b>21454717</b>         | <b>22212612</b>        | <b>Homozygous deletion (-1.268826)</b>   |
|                                          | <b>21q11.2 - q22.3 (whole arm)</b>       | <b>14420615</b>         | <b>48090317</b>        | <b>Gain (0.29937)</b>                    |
| Case 4                                   | 22q11.23                                 | 24347959                | 24390254               | Homozygous deletion (-1.52085)           |
|                                          | 5p15.33 - q35.3 (whole chromosome)       | 26142                   | 180684501              | Gain (0.429411)                          |
|                                          | 6p22.1                                   | 29854870                | 29896710               | Gain (2.672552)                          |
|                                          | <b>7p22.3 - q36.3 (whole chromosome)</b> | <b>42976</b>            | <b>159118566</b>       | <b>Gain (0.439458)</b>                   |
|                                          | 8p11.22                                  | 39237438                | 39374789               | Homozygous deletion (-1.238193)          |
|                                          | 9p21.3                                   | 21957735                | 22017397               | Homozygous deletion (-1.342227)          |
|                                          | 10p15.3 - p11.1(whole arm)               | 148206                  | 39076591               | Heterozygous deletion (-0.549255)        |
|                                          | <b>10q11.21 - q26.3 (whole arm)</b>      | <b>42864620</b>         | <b>133956779</b>       | <b>Heterozygous deletion (-0.536525)</b> |
|                                          | 13q12.11 - q34 (whole arm)               | 19526064                | 115089535              | Gain (0.775586)                          |
|                                          | <b>17p13.3 - p11.2 (whole arm)</b>       | <b>96559</b>            | <b>22154574</b>        | <b>Gain (0.339977)</b>                   |
| 17q11.1 - q25.3 (whole arm)              | 25403446                                 | 81062925                | Gain (0.420042)        |                                          |
| Case 5                                   | <b>19q13.12 - q13.13</b>                 | <b>37349894</b>         | <b>38698864</b>        | <b>Heterozygous deletion (-0.308813)</b> |
|                                          | 20p13 - q13.33 (whole chromosome)        | 151549                  | 62904501               | Gain (0.356953)                          |
|                                          | <b>2q22.1</b>                            | <b>141928411</b>        | <b>142036954</b>       | <b>Heterozygous deletion (-0.815427)</b> |
|                                          | <b>3q13.31</b>                           | <b>115593958</b>        | <b>115644733</b>       | <b>Homozygous deletion (-1.991462)</b>   |
|                                          | 3q26.1                                   | 162514534               | 162619141              | Homozygous deletion (-1.849218)          |
|                                          | 4q13.2                                   | 69392545                | 69462438               | Homozygous deletion (-1.831354)          |
|                                          | <b>4q34.3 - q35.1</b>                    | <b>182902844</b>        | <b>183568174</b>       | <b>Heterozygous deletion (-0.61287)</b>  |
|                                          | 6p22.1                                   | 29854870                | 29896710               | Homozygous deletion (-1.236831)          |
|                                          | 8p11.22                                  | 39237438                | 39345479               | Gain (0.671442)                          |
|                                          | 9p21.3                                   | 21944037                | 22176231               | Homozygous deletion (-1.62978)           |
|                                          | 15q11.1-q11.2                            | 20575646                | 21933378               | Gain (0.937772)                          |
|                                          | 20p12.1                                  | 14903016                | 15015311               | Heterozygous deletion (-0.880196)        |
|                                          | 22q11.23                                 | 24347959                | 24390254               | Homozygous deletion (-1.449985)          |

CNA detected only in the epithelioid glioblastoma area are shown in **bold**.

CNA detected both in the epithelioid glioblastoma and lower-grade glioma areas are not in bold.

Loc., location on chromosome.

\*Genome mapping based on genome build hg19.

\*\*The numbers in parentheses are the average log2 ratio of each aberration.
